# Supplementary material for: Increased heart rate variability but no effect on blood pressure from 8 weeks of hatha yoga – a pilot study
Source: PubMed Central journal article supplement (PMC3599360; doi:10.1186/1756-0500-6-59), 2013-02-11

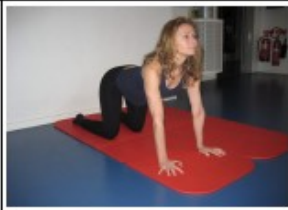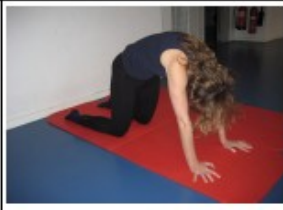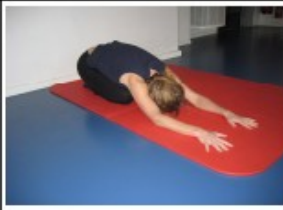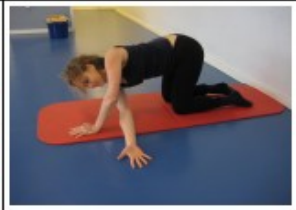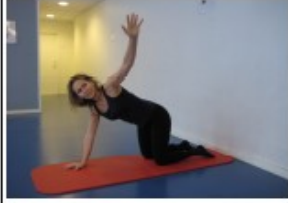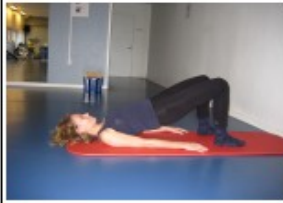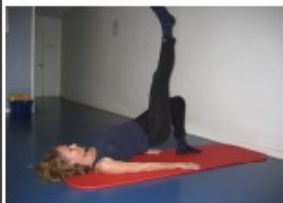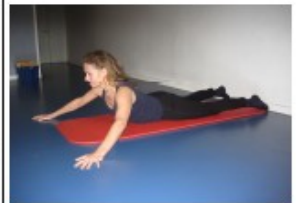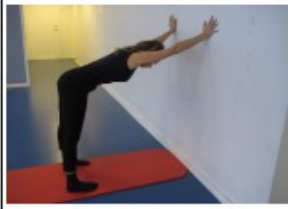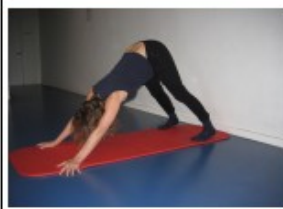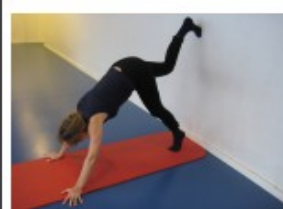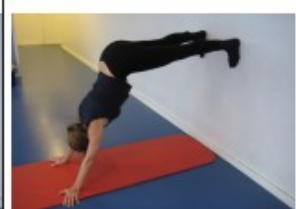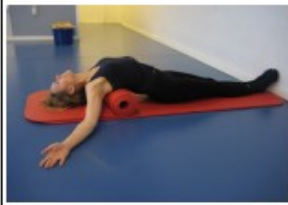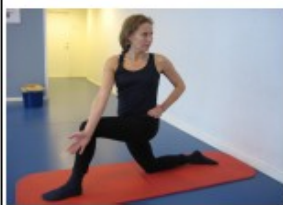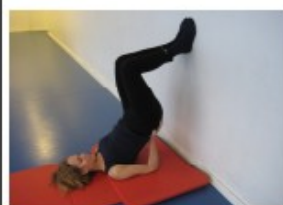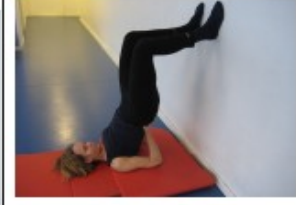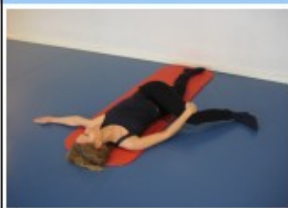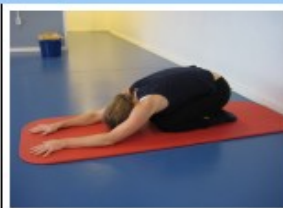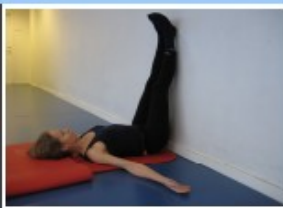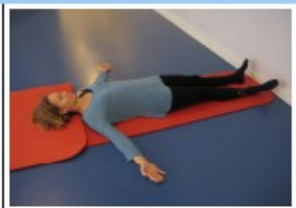

Supplement: 1756-0500-6-59-S1.pdf [file 1756-0500-6-59-S1.pdf]
